1     **Business as Un-usual: Access to mental health and primary care services for people**  
2                     **with severe mental illness during the COVID-19 restrictions**

3

4

5             **Short Title: Access to services for people with severe mental illness during the**  
6                                     **COVID-19 restrictions**

7

8

9     **Authors**

10    Elizabeth Newbrunner<sup>1\*</sup>, Panagiotis Spanakis<sup>1</sup>, Ruth Wadman<sup>1</sup>, Suzanne Crossland<sup>1</sup>, Paul

11    Heron<sup>1</sup>, Gordon Johnston<sup>2</sup>, Lauren Walker<sup>1</sup>, Simon Gilbody<sup>1</sup>, Emily Peckham<sup>1</sup>

12

13

14

15    1. Mental Health and Addiction Research Group, University of York, Heslington, YO10 5DD

16    2. Independent peer researcher

17

18

19    \*Corresponding author. Email: [liz.newbrunner@york.ac.uk](mailto:liz.newbrunner@york.ac.uk)

20

## 21 **Abstract**

22 **Aims:** To explore: how satisfied people with severe mental illness (SMI) are with the support  
23 received during the pandemic; understand any difficulties encountered when accessing both  
24 mental health and primary care services; consider ways to mitigate these difficulties; and  
25 assess the perceived need for future support from mental health services.

26 **Materials and Methods:** A representative sample was drawn from a large transdiagnostic  
27 clinical cohort of people with SMI, which was recruited between April 2016 and March 2020.  
28 The sample was re-surveyed a few months after the beginning of the restrictions. Descriptive  
29 frequency statistics were used to analyse the quantitative data. The free text responses were  
30 analysed thematically.

31 **Results:** 367 participants responded to the survey. Two thirds were receiving support from  
32 mental health services with the rest supported in primary care or self-managing. A quarter  
33 thought they would need more mental health support in the coming year. Half had needed to  
34 use community mental health services during the pandemic and the majority had been able  
35 to get support. A minority reported that their mental health had deteriorated but they had  
36 either not got the supported they wanted or had not sought help. The biggest service change  
37 was the reduction in face-to-face appointments and increasing use of phone and video call  
38 support. Nearly half of those using mental health services found this change acceptable or  
39 even preferred it; acceptability was influenced by several factors. Participants were more  
40 likely to be satisfied with support received when seen in person.

41 **Discussion:** Although most participants were satisfied with the mental health support they  
42 had received, a minority were not. This, couple with findings on future need for mental health  
43 support has implications for post pandemic demand on services. Remote care has brought  
44 benefits but also risks that it could increase inequalities in access to services.

45

46

47

## 48 Introduction

49 In mid-March 2020, soon after the WHO declared the outbreak of COVID-19 to be a  
50 pandemic, sweeping changes in the way mental health and primary care services in the UK  
51 are provided were introduced. A survey of mental health staff, conducted early in the first  
52 wave of the pandemic in the UK (i.e April/May 2020) found that the number of face-to-face  
53 meetings was reduced, and phone and video appointments and support were rapidly  
54 introduced [1]. This observation was supported by a recent report from the House of Lords  
55 Covid-19 Committee [2]. In most areas of the UK the frequency of contacts and the range of  
56 both NHS and third sector services available also reduced [3]. Research is beginning to  
57 explore the impact of the pandemic and the pandemic restrictions on people with pre-  
58 existing mental health conditions. However, there has been little research into the specific  
59 experiences of people living with severe mental illness (SMI), and in particular how their  
60 access to mental health and primary care services may have changed.

61

62 People with SMI are an especially vulnerable group who already experience significant  
63 health inequalities. Notably they currently experience a mortality gap of 15-20 years when  
64 compared to people without SMI [4, 5, 6]. An important driver for this gap is preventable  
65 physical health conditions, linked to behavioural risk factors, such as poor diet and smoking.  
66 However, access to and take-up of services is also a factor [7, 8]. There are concerns that  
67 the changes in the way services have been delivered during the pandemic may have further  
68 increased the barriers to access that people with SMI experience (e.g. access to digital  
69 technologies or familiarity/confidence in using them) [9,10]. It is therefore important to:  
70 explore how satisfied people with SMI are with the support they received during the  
71 pandemic; understand any difficulties they encountered when accessing both mental health  
72 and primary care services; consider ways to mitigate these difficulties; and assess the  
73 perceived need for future support from mental health services. The aim of this study was to  
74 use a large clinical cohort of people with SMI, which was recruited in the years immediately

75 prior to the pandemic restrictions and was re-surveyed a few months after the beginning of  
76 the restrictions, to explore these issues.

77

## 78 **Materials and Methods**

79 The Closing the Gap (CtG) study is a large (n=9,914) transdiagnostic clinical cohort recruited  
80 between April 2016 and March 2020. Participants have documented diagnoses of  
81 schizophrenia or delusional/psychotic illness (ICD 10 F20.X & F22.X or DSM equivalent) or  
82 bipolar disorder (ICD F31.X or DSM-equivalent). The composition of the CtG cohort has  
83 previously been described [11].

84

85 We were funded to explore the impact of the COVID-19 pandemic in a sub-section of the  
86 CtG clinical cohort and we identified participants for Optimising Well-being in Self-Isolation  
87 study (OWLS) (<https://sites.google.com/york.ac.uk/owls-study/home>). To ensure that the  
88 OWLS COVID-19 sub-cohort was representative we created a sampling framework based  
89 on gender, age, ethnicity and whether they were recruited via primary or secondary care.  
90 OWLS participants were recruited from 17 mental health trusts and six primary care Clinical  
91 Research Networks (across urban and rural settings in England).

92

93 To be eligible to take part in OWLS COVID-19 study, people had to be aged 18 or over,  
94 have taken part in the CtG study and have consented to be contacted again about further  
95 research. They must also have been originally recruited from a clinical site with capacity to  
96 support the OWLS study. This approach enabled us to create longitudinal data linkage and  
97 to rapidly identify participants during the COVID-19 pandemic. To increase the chances of  
98 participants responding and their contact details remaining current, we invited the  
99 participants who had been more recently recruited to the CtG cohort. People who met the  
100 eligibility criteria were contacted by telephone or letter and invited to take part in the OWLS  
101 COVID-19 study. Those who agreed to take part were offered three options; i) complete the

102 survey over the phone with a researcher, ii) be sent a link to complete the survey online or  
103 iii) be sent a hard copy of the questionnaire in the post to complete and return.

104

105 In Section 2 of the survey, we explored how participants' access to mental health and  
106 primary care services had changed during the pandemic. For example, we asked  
107 participants who were receiving support from mental health services, whether they had  
108 experienced one or more specific change (e.g. seeing a different mental health worker to the  
109 person they normally saw). If they had, they could indicate how they felt about the change  
110 with one of three answers (i.e. I like it better; its ok – not better or worse; or I don't like it).

111 The full OWLS 1 questionnaire is shown in the supplementary materials (S1). For all  
112 services, we were interested to understand how changes in the way services were provided,  
113 in particular the shift to phone and online meetings and appointments, might have affected  
114 peoples' experiences. We also wished to explore what factors might have hindered or  
115 facilitated good care and support, despite the change in access to services. For mental  
116 health services we also asked people about the support they anticipated needing from  
117 services in the year ahead, an issue of particular interest to NHS providers.

118

119 The study analysis plan was registered on Open Science Framework (available at  
120 <https://doi.org/10.17605/OSF.IO/E3KDM> - section 2.1). Descriptive frequency statistics (Ns  
121 and percentages) were used to describe key sample characteristics and service use  
122 variables. 2x2 cross-tabulations and chi-square tests were used to examine the association  
123 between a) unmet need for support and changes in mental or physical health, and b) mode  
124 of service delivery and service satisfaction. The latter was examined for each service type  
125 separately (GPs, Community mental health, Mental health crisis services) and p values were  
126 corrected for multiple testing (p multiplied by four). For brevity, the results for general  
127 hospital services are not included in the main text of the paper but are available in the  
128 supplementary materials (S2). The statistical significance criterion used for all analyses was  
129  $p < 0.05$ . Analyses were undertaken using SPSS v.26.

130 In the pre-registered analysis plan it was stated that mode of service delivery would be  
131 coded at three-levels (in person, over the phone, or online e.g. video call). However, too few  
132 participants reported receiving services online (N ranged from 2 to 14, depending on service  
133 type) to allow for meaningful comparisons, and so this was merged with receiving services  
134 over the phone into a remote delivery category. The plan also stated that association  
135 between Community mental health service satisfaction and mode of service delivery would  
136 be stratified per primary or secondary care patients. As very few participants currently in  
137 primary care reported getting support from Community mental health services (N = 24) to  
138 allow for meaningful comparisons, analysis was conducted only in the full sample.

139

140 At the end of the survey there was a free text box where respondents could add comments  
141 about any aspect of their experiences during the pandemic. 147 (40%) respondents chose to  
142 do so. These free text responses were transferred to NVivo and then analysed thematically  
143 [12]. The seven sections of the survey provided the initial structure for the analysis. Fifty-two  
144 respondents added comments which in some way related to their access to or experience of  
145 using of services. Quotations from the free text analysis are used in this paper to illustrate or  
146 bring to life the findings from the quantitative data.

147

148 The authors assert that all procedures contributing to this work comply with the ethical  
149 standards of the relevant national and institutional committees on human experimentation  
150 and with the Helsinki Declaration of 1975, as revised in 2008. All procedures involving  
151 human subjects/patients were approved by the North West – Liverpool Central Research  
152 Ethics Committee (reference 20/NW/0276). Written or verbal informed consent was obtained  
153 from all subjects/patients.

154

## 155 **Results**

156 In this section we begin by briefly describing the demographic characteristics of the OWLS  
157 participants. We then present our findings in relation to participants experiences of  
158 accessing both community mental health services and mental health crisis services, and  
159 their perceived need for future support from mental health services. We then go on to  
160 describe their experiences of using primary care services.

161

162 The first survey for the OWLS COVID-19 study, which was conducted between July to  
163 December 2020, recruited 367 people from the CtG Cohort. Table 1 describes the socio-  
164 demographic characteristics and diagnosis of OWLS participants. It should be noted that it  
165 was an ethical requirement of the CtG study that the participants consent to their diagnosis  
166 being provided to the research team and some participants did not consent to this. In the  
167 interests of inclusivity and because there may be some differences between those who  
168 consented to their diagnosis being provided and those who did not, we did not make it a  
169 requirement of OWLS that the participants should consent to their diagnosis being provided.  
170 The mean age was 50.5 (range = 20 to 86, SD  $\pm$  15.69) with 51.0% male and 77.4% white  
171 British.

172 **Table 1: Demographic characteristics of OWLS COVID-19 study SMI population during**  
173 **pandemic restrictions**

| Characteristic           | Number (%)   |
|--------------------------|--------------|
|                          | Total N= 367 |
| <b>Gender</b>            |              |
| Male                     | 187 (51.0)   |
| Female                   | 174 (47.4)   |
| Transgender              | 6 (1.6)      |
| <b>Age (mean, range)</b> | 50.5 (20-86) |
| <b>Ethnicity</b>         |              |

|                             |            |
|-----------------------------|------------|
| White British               | 284 (77.4) |
| Asian British/Asian         | 24 (6.5)   |
| Other white                 | 18 (4.9)   |
| Black British/Black         | 15 (4.1)   |
| Other non-white             | 12 (3.3)   |
| Mixed white/black           | 5 (1.4)    |
| Mixed white/Asian           | 5 (1.4)    |
| Other mixed                 | 4 (1.1)    |
| <b>Index of deprivation</b> |            |
| Very high deprivation       | 97 (26.4)  |
| High deprivation            | 81 (22.1)  |
| Moderate deprivation        | 67 (18.3)  |
| Low deprivation             | 55 (15.0)  |
| Very low deprivation        | 52 (14.2)  |
| <b>Diagnosis</b>            |            |
| Psychosis                   | 188 (51.2) |
| Bipolar                     | 108 (29.4) |
| Other SMI                   | 23 (6.3)   |
| Not recorded                | 48 (13.1)  |

174 Note: Some percentages might not add up to 100% due to missing values.

175

## 176 **Mental Health Services**

177 Of the 367 people who completed the survey, 224 (61%) were receiving support from mental  
178 health services, with the rest being supported in primary care or self-managing.

## 179 **Community Mental Health Services**



180 Just over half of the survey respondents (194/52.9%) had needed to used community mental  
 181 health services during the pandemic and the overwhelming majority reported that they had  
 182 been able to get support. The quotation below highlights the creative approaches sometimes  
 183 adopted by mental health staff to maintain support:

184

185 *“My CPN [Community Psychiatric Nurse] was very supportive and has organised my*  
 186 *Clozaril bloods to be taken in my garden so I don't need to travel all the way to*  
 187 *[TOWN]. I receive regular telephone calls from my CPN and face to face visits every*  
 188 *2 to 3 weeks.”*

189

190 We examined whether there was any difference between those who said that their mental  
 191 health had deteriorated and those who said it had not, in terms of getting support. As Table 2  
 192 below shows there was no significant association between deterioration in mental health and  
 193 receiving mental health services ( $\chi^2(1) = .99, p = .319$ ). However, 14.5% (n=12) did report  
 194 that their mental health had deteriorated but they had either not got the supported they  
 195 wanted or had not sought help. One of the free text comments illustrates this: *“Before the*  
 196 *pandemic I wasn't using MH services but as my MH has gotten worse then I have become*  
 197 *very conscious of not being able to access services”*.

198 **Table 2 Change in mental health and support from community mental health services**

| Mental health change since beginning of pandemic | Did you get support from community mental health services? |                           |       |
|--------------------------------------------------|------------------------------------------------------------|---------------------------|-------|
|                                                  | Yes (N = 164)                                              | No/Haven't tried (N = 22) | Total |
| Deterioration                                    | 71 (85.5%)                                                 | 12 (14.5%)                | 83    |
| No deterioration                                 | 93 (90.3%)                                                 | 10 (9.7%)                 | 103   |

199 Note: 8 missing. Percentages are per row.

200

201 Our Lived Experience Advisory Panel suggested that for many people with mental health  
 202 needs, having confidence that support would be forthcoming if required, was important for  
 203 peoples' wellbeing. So, we asked all survey respondents how confident they felt about  
 204 support being available, should they need it. More than half (207/56.4%) felt they would be  
 205 able to access help, but a substantial minority (158/43.1%) were not confident that support  
 206 would be available.

### 207 **Changes to the Way Mental Health Services were Provided**

208 The pandemic led to substantial and rapid changes in the way in which mental health  
 209 services were provided. The biggest shift was the reduction in face-to-face appointments  
 210 and increasing use of phone and online consultations and support. However, people also  
 211 experienced less frequent contact with services, or had a more limited range of services  
 212 (including community and voluntary sector services) available to them. A few people saw a  
 213 different mental health worker. We asked the people who were currently receiving support  
 214 from mental health services (n=224) how they felt about these changes and 221 provided  
 215 responses. Table 3 provides an overview of their responses.

216 **Table 3 Views about change in the way mental health services were provided**

|                                                                            | I have not experienced this change | I like it better | Its OK – not better or worse | I don't like it |
|----------------------------------------------------------------------------|------------------------------------|------------------|------------------------------|-----------------|
| I had support on the telephone/online instead of face-to-face appointments | 44 (19.9%)                         | 32 (14.5%)       | 74 (33.5%)                   | 71 (32.1%)      |
| I had less frequent contact with mental health services                    | 105 (47%)                          | 12 (5.4%)        | 59 (26.7%)                   | 45 (20.4%)      |
| I had more frequent contact with mental health services                    | 147 (67%)                          | 19 (8.7%)        | 41 (18.8%)                   | 11 (5%)         |

|                                                                                    |             |          |            |            |
|------------------------------------------------------------------------------------|-------------|----------|------------|------------|
| I had a more limited range of services or support                                  | 104 (47.7%) | 9 (4.1%) | 45 (20.6%) | 60 (27.5%) |
| I saw a different mental health worker to the person who would normally support me | 149 (68.7%) | 9 (4.1%) | 40 (18.4)  | 19 (8.8%)  |
| I went to a different place for appointments or support                            | 170 (79.1%) | 8 (3.7%) | 22 (10.2%) | 15 (7%)    |

217 Note: Percentages are per row

218

219 The results show that despite the impact of the pandemic, a high proportion of those survey  
 220 respondents who were in contact with mental health services, were seeing the same mental  
 221 health worker, often in the same place. Clearly many people were being supported on the  
 222 telephone or online instead of face to face, and whilst almost a third did not like this change,  
 223 nearly half found it acceptable or even preferred it.

224

225 The findings from the OWLS study in relation to access to digital devices are reported in a  
 226 separate paper. However, it is useful to note here that the majority of study participants did  
 227 have access to a smartphone, tablet, laptop and/or desktop computer. However, 13.4%  
 228 (n=49) did not have any of these devices. The free text comments also suggested that even  
 229 where people did have access to such devices, they may not have exclusive use (e.g. a  
 230 'family' computer), their internet access may be limited or there may be practical and  
 231 emotional concerns associated with online appointments.

232

233 Focusing specifically on the 168 people who had received support from community mental  
 234 health services, just over half (n=89/52.7%) had received that support in person. Sixty-six  
 235 people (39.1%) had support over the phone and a minority (n=14/3.8) had some kind of  
 236 online video support (e.g. NHS Attend Anywhere). Almost two thirds (n=112/65.9%) were

237 completely satisfied with the support they received but as Table 4 below shows, there was a  
238 significant association between satisfaction with the support received from community  
239 mental health services and the way in which it was provided ( $\chi^2(1) = 22.92, p < .001$ ).  
240 Specifically, the proportion of those who reported receiving support in person and were  
241 completely satisfied was significantly higher than the proportion of those who reported  
242 receiving support remotely and were completely satisfied.

243 **Table 4 Satisfaction with support from community mental health services**

| Did you receive the level of support you needed from your Community Mental Health Services? | How was your appointment delivered? |                       |
|---------------------------------------------------------------------------------------------|-------------------------------------|-----------------------|
|                                                                                             | In person (N = 89)                  | Phone/Online (N = 79) |
| Completely                                                                                  | 73 (82.0%)                          | 37 (46.8%)            |
| Partly/No                                                                                   | 16 (18.0%)                          | 42 (53.2%)            |

244 Note: Percentages are per column

245

246 Many of the free text comments added by respondents were concerned with the shift to  
247 phone and online support, including practical difficulties this created:

248

249 *“I have had a referral back to mental health services, and I am due to have a phone*  
250 *appointment with a doctor. I will have to find a quiet place to go during work time*  
251 *which will not be easy and I'm worried that I might be overheard. The last appointment*  
252 *was three hours later than scheduled so I am also worried that it will conflict with*  
253 *other appointments or meetings I have that day.”*

254

255 People also highlighted the importance of having an established relationship with their  
256 mental health professional: *“Fortunately, I got to know my new CPN through a few face-to-*  
257 *face visits and built a rapport so that now that we speak online it is okay - without the face-*

258 *to-face it would have been more difficult*". Others emphasized how much they valued face to  
259 face contact:

260

261 *"I have had 3 appointments with my psychiatrist over the phone during the lockdown*  
262 *and found this to be a poor substitute compared to a face-to-face meetings. At first*  
263 *my CPN called me once a week for about a 20 minute phone call then we used*  
264 *Attend Anywhere the NHS video calling service. Finally, for the last month of the*  
265 *previous lockdown we met in the garden of the local CMHT under a gazebo wearing*  
266 *masks and social distancing. It was great to see my CPN again after so many*  
267 *months and gave me a real boost."*

268

269 Interestingly, a small number of people said they preferred the option of phone and online  
270 support, finding it more convenient or less stressful: *"I don't need to be stressed about going*  
271 *out or on the bus, things that make my paranoia and voices worse. And I don't have to leave*  
272 *my dog on her own"*.

## 273 **Mental Health Crisis Services**

274 Almost a fifth of respondents (n=59/16.1%) had needed to use mental health crisis services.  
275 Over three quarters of this group (n=45/76.3%) were able to get support but a significant  
276 minority (n=14/23.7%) reported that they either did not get the support they needed or did  
277 not try to get help. The free text comments suggest that for this group the implications of not  
278 being able to access support were potentially very serious:

279

280 *"Just before lockdown I was trying to manage without medication. I then hit crisis*  
281 *point over a bank holiday period during lockdown. After several calls to the crisis*  
282 *team I was unable to get any help. It wasn't until a suicide attempt did I start to get*  
283 *help. I have only asked for help twice in seven years, so have never abused the*  
284 *service. The overstretched system was sadly lacking in an extreme time of need."*

285

286 We also explored satisfaction with the way in which support was provided (see Table 5). We  
287 found there was no significant association between receiving the level of support needed  
288 from mental health crisis services and the way in which this support was provided ( $\chi^2(1) =$   
289  $.07, p = 4.000$ ) (i.e. the proportion of those who were completely satisfied with the support  
290 they received was broadly similar for the in person and phone/online groups).

291 **Table 5 Satisfaction with support from mental health crisis services**

| Did you receive the level of support you needed from you Mental Health Crisis Services? | How was your appointment delivered? |                               |
|-----------------------------------------------------------------------------------------|-------------------------------------|-------------------------------|
|                                                                                         | In person ( <i>N</i> = 20)          | Phone/Online ( <i>N</i> = 25) |
| Completely                                                                              | 12 (60.0%)                          | 14 (56.0%)                    |
| Partly/No                                                                               | 8 (40.0%)                           | 11 (44.0%)                    |

292 Note: Percentages are per column.

293

## 294 **Future Need for Mental Health Services**

295 There is substantial interest within the NHS about the impact of the COVID-19 pandemic on  
296 future need for mental health services and we were able to explore this to a limited extent in  
297 this study. We asked those people who were not currently getting support from mental health  
298 services whether they thought they would need support in the year ahead, and just under a  
299 third ( $n=44/31.7\%$ ) thought they would.

300

301 For those people who were already being supported by mental health services, we asked  
302 how their need for support might change in the year ahead. As Table 6 below shows, just  
303 over a quarter thought they would need more support either because their mental health had  
304 declined, or they had been putting off dealing with some issues, or they felt the support they

305 had prior to the pandemic was insufficient, and almost a quarter thought they might need  
 306 more support.

307 **Table 6 Perceived need for support from mental health services in the year ahead**

| About the year ahead, which of the following fits you best?                                                                    | N (%) – out of total N = 224 |
|--------------------------------------------------------------------------------------------------------------------------------|------------------------------|
| I think I will need the same of less support – my mental health has improved during the pandemic                               | 37 (16.5)                    |
| I don't think the support I need will change – I've been ok during the pandemic.                                               | 71 (31.7)                    |
| I might need more support – the pandemic has been difficult for me but I am going to see how thing go.                         | 54 (24.1)                    |
| I will need more support – during the pandemic my mental health has got worse                                                  | 32 (14.3)                    |
| I will need more support – I put off dealing with some things during the pandemic but now I want to get advice/help with them. | 18 (8.0)                     |
| I didn't have enough support before the pandemic and I still need more support                                                 | 10 (4.5)                     |

308 Note: This question was only asked of participants who were currently getting support from  
 309 mental health services.

310

### 311 **Primary Care Services**

312 Two thirds of the survey respondents (n=240) had needed to use their GP practice services  
 313 during the pandemic (for mental and/or physical health conditions). Of this group, the  
 314 majority (n=207/86%) reported that they had been able to get an appointment and most  
 315 (n=154/74.4%) felt they had received the care and support they needed. However, like

316 mental health services, GP practices also moved to much greater use of phone and video  
 317 consultations. We examined whether there was any association between deterioration in  
 318 physical health and access to GP care and support. Table 7 below shows that there was no  
 319 significant association ( $\chi^2(1) = .14, p = .706$ ).

320 **Table 7 Changes in physical health and support from GP services**

| Physical health change since beginning of pandemic | Did you get support from GP services? |                                   |       |
|----------------------------------------------------|---------------------------------------|-----------------------------------|-------|
|                                                    | Yes ( <i>N</i> = 202)                 | No/Haven't tried ( <i>N</i> = 29) | Total |
| Deterioration                                      | 77 (38.1%)                            | 10 (34.5%)                        | 87    |
| No deterioration                                   | 125 (61.9%)                           | 19 (65.5%)                        | 144   |

321 Note: Percentages are per row.

322

323 We then examined whether people felt they had received the support they needed. Almost  
 324 three quarters reported that they had but there was a marked different between those who  
 325 had had a face-to-face appointment and those supported on the phone or online. As Table 8  
 326 shows, people were more likely to feel completely satisfied with the support they received  
 327 when it was face-to-face ( $\chi^2(1) = 10.46, p = .008$ ).

328 **Table 8 Satisfaction with support from GP services**

| Did you receive the level of support you needed from your GP? | How was your appointment delivered? |                                |
|---------------------------------------------------------------|-------------------------------------|--------------------------------|
|                                                               | In person ( <i>N</i> = 87)          | Phone/Online ( <i>N</i> = 119) |
| Completely                                                    | 75 (86.2%)                          | 79 (66.4%)                     |
| Partly/No                                                     | 12 (13.8%)                          | 40 (33.6%)                     |

329 Note: Percentages are per column.

330



331 In relation to medication and pharmacy services, most survey respondents (n=330/89%) had  
332 needed prescription medication during the pandemic and almost all were able to obtain their  
333 medication from their usual pharmacy. However, the free text comments revealed that a few  
334 people had experienced delays and difficulties with the supply of their usual medication.  
335 One respondent said that they were on three types of medication, and at one point had to go  
336 to three different pharmacies to get the medication they needed. They noted that they were  
337 relatively well but felt that if they had not been, they might have stopped taking their  
338 medication. Another explained:

339

340 *“There was a shortage of medication supply in the area. I struggled to get my*  
341 *prescription tablets and when I eventually got them then I got a slightly different type*  
342 *(tablets vs capsules). I wasn't sure what would replace them and how I would deal*  
343 *with them - at the time I thought they were going to give me a different drug and the*  
344 *ones I take are quite a fine balance. So that was very worrying.”*

345

## 346 **Discussion**

347 Most participants reported that they had been able to access support from community  
348 mental health services and a relatively high proportion said they were satisfied with the  
349 support they received. This contrasts with the findings from a qualitative study by Gillard et al  
350 [10] in which participants reported issues around continuity of care, not getting treatment as  
351 usual and service changes. However, in our study a minority did report that their mental  
352 health had deteriorated but they had either not got the supported they wanted or had not  
353 sought help. This is an issue of concern, which alongside our findings on future need for  
354 increased support, may have implications in terms of post-pandemic increased demand for  
355 mental health services. Furthermore, for some people living with severe mental illness, the  
356 fear of becoming unwell and not being able to access support is a source of anxiety. A  
357 substantial minority of participants in our study did not feel confident that support would be

358 available should they need – a perception that mental health services may need to explore  
359 and address.

360

361 The biggest change in the way in which mental health services were provided was the  
362 reduction in face-to-face appointments and the increase in remote care. We found that  
363 almost half those who had used community mental health service had received support in  
364 person, with staff using creative approaches to maintaining face-to-face contact. Many  
365 people were being supported on the telephone and a few had online support. Whilst almost  
366 a third did not like this change, nearly half found it acceptable or even preferred it. However,  
367 the free text comments suggest that acceptability was influenced by several factors. In  
368 particular, respondents felt that telephone or video appointments were far easier when: they  
369 had an established relationship with their mental health professional; where they had  
370 somewhere private to hold a telephone conversation; or they had access to a (private) digital  
371 device - findings which echo those of a recent qualitative study by Liberati et al [13].  
372 Furthermore, whilst increased use of remote mental health care might be acceptable for a  
373 limited period, during a public health crisis, in the long term it could lead to problems with  
374 accessibility, equity of care and service quality [9,10,13]. The limited availability of online  
375 support reported by participants in our study, suggests that Greenhalgh et al [14] are correct  
376 in suggesting that the evidence relating to video-based remote care needs to be  
377 strengthened. Interestingly, whilst people were more likely to be satisfied with the support  
378 they received from community mental health service when they had been seen in person, in  
379 mental health crisis services the way support was provided appeared less important. We  
380 speculate that this could be because phone support is already commonly used in crisis  
381 services and/or because remote care facilitated more rapid access to support.

382

383 With regard to access to primary care services, the majority of participants had been able to  
384 get an appointment and most felt they had received the care and support they needed.

385 However, those who had a face-to-face appointment were more likely to feel satisfied with

386 the support they received. Interestingly, the free text comments revealed a specific issue in  
387 relation to obtaining medication, with a number of respondents reporting delays and  
388 difficulties with the supply of their usual medication.

389

390 Overall then, our study found that the majority of people with SMI were able to access  
391 support but those who received remote support were less likely to be satisfied with that  
392 support. Furthermore, the context of remote support was important. This suggests that if, as  
393 seems likely, service providers continue to employ some element of remote care, service  
394 users should have a choice about whether they want remote care and the mode of remote  
395 support they receive. More broadly, as services continue to adapt to the prevailing pandemic  
396 situation and review future provision, there should be a renewed focus on the implications of  
397 intersectionality. Specifically, how the experience of living with severe mental illness,  
398 coupled with other vulnerabilities or disadvantages such as disabling physical conditions, low  
399 income, and ethnicity can create even greater inequalities in access to services.

400

401 The findings from this study suggest that some people with SMI do not feel that they have  
402 received enough support during the pandemic, or have been reluctant to seek support,  
403 perhaps because of the way services were provided or fear of contracting the virus. As a  
404 consequence, when the pandemic restrictions ease there could be an increase in demand  
405 from mental health services from existing service users. However, this may be tempered by  
406 the fact that many mental health professionals and GPs appear to have prioritised support  
407 for people with SMI and found creative ways to maintain some face-to-face contact.

408

409 Some of the changes introduced as a result of the COVID-19 pandemic will almost certainly  
410 continue to be part of future mental health and primary care service. These changes can  
411 bring benefits for service providers and some service users. However, they could also  
412 increase the risk of unequal access to support and poorer quality of care. To counter these  
413 risks, people with SMI must be consulted about the nature of any long-term changes, and

414 going forward, close attention needs to be paid to services users' individual circumstance  
415 and preferences.

416

## 417 **Acknowledgements**

418 We would like to thank all the participants in the OWLS study, the lived experience panel  
419 who provided advice throughout the study, and the mental health trust and CRN staff who  
420 supported study recruitment.

421

## 422 **References**

423 1. Johnson S, Dalton-Locke C, Vera San Juan N, Foye U, Oram S, Papamichail A, et al.

424 Impact on Mental Health Care and on Mental Health Service Users of the COVID-19

425 Pandemic: A Mixed Methods Survey of UK Mental Health Care Staff. *Soc Psychiatry*

426 *Psychiatr Epidemiol.* 2021; 56, no.1: 25-37.

427 2. House of Lords. (2021). *Beyond Digital: Planning for a Hybrid World*. 1st Report of the

428 session 2019-21 House of Lords COVID-19 Committee. Available from:

429 <https://publications.parliament.uk/pa/ld5801/ldselect/ldcovid19/263/26302.htm>

430 3. Burton A, McKinlay A, Aughterson H, Fancourt D. Impact of the Covid-19 pandemic on the

431 mental health and wellbeing of adults with mental health conditions in the UK: A qualitative

432 study. medRxiv 20241067 [Preprint]. 3 December 2020 [cited 17 May 2021]. Available from:

433 <https://doi.org/10.1101/2020.12.1.20241067>

434 4. Chang CK, Hayes RD, Perera G, Broadbent MTM, Fernandes AC, Lee WE, et al. Life

435 expectancy at birth for people with serious mental illness and other major disorders from a

436 secondary mental health care case register in London. *PloS One.* 2011; Vol.6 (5), p.e19590-

437 e19590.

438 5. Walker ER, McGee RE, Druss BG. Mortality in mental disorders and global disease

439 burden implications: a systematic review and meta-analysis. *JAMA Psychiatry.* 2015;

440 72(4):334-41.

- 441 6. Hjørthøj C, Stürup AE, McGrath JJ, Nordentoft M. Years of potential life lost and life  
442 expectancy in schizophrenia: a systematic review and meta-analysis. *Lancet Psychiatry*.  
443 2017; 4(4):295-301.
- 444 7. The Lancet Psychiatry. Mental health and COVID-19: change the conversation. *Lancet*  
445 *Psychiatry* 2020; 7(6):463.
- 446 8. Sheridan Rains L, Johnson S, Barnett P, Steare T, Needle JJ, Carr S, et al. Early Impacts  
447 of the COVID-19 Pandemic on Mental Health Care and on People with Mental Health  
448 Conditions: Framework Synthesis of International Experiences and Responses. *Soc*  
449 *Psychiatry Psychiatr Epidemiol*. 2021; 56.1: 13-24.
- 450 9. Allwood L, Bell A. Covid-19: understanding inequalities in mental health during the  
451 pandemic. Centre for Mental Health, 18 June 2020.
- 452 10. Gillard S, Dare C, Hardy J, Nyikavaranda P, Rowan Olive R, Shah P, et al. Experiences  
453 of Living with Mental Health Problems during the COVID-19 Pandemic in the UK: A  
454 Coproduced, Participatory Qualitative Interview Study. *Soc Psychiatry Psychiatr Epidemiol*.  
455 2021; 03-04.
- 456 11. Mishu MP, Peckham EJ, Heron PN, Tew GA, Stubbs B, Gilbody S. Factors associated  
457 with regular physical activity participation among people with severe mental ill health. *Soc*  
458 *Psychiatry Psychiatr Epidemiol*. 2019;54(7):887-95.
- 459 12. Braun V, Clarke V. Using thematic analysis in psychology. *Qual Res Psychol*.  
460 2006; 3:2, 77-101.
- 461 13. Liberati E, Richards N, Parker J, Willars J, Scott D, Boydell N, et al. Remote Care for  
462 Mental Health: Qualitative Study with Service Users, Carers and Staff during the COVID-19  
463 Pandemic. *BMJ Open*. 2021; 11: E049210.
- 464 14. Greenhalgh T, Wherton J, Shaw S. Video Consultations for covid-19. *BMJ*. 2020; 368,  
465 M998.
- 466
- 467

468 **Supporting Information**

469 S1 OWLS 1 Survey

470 S2 Results for General Hospital Services
